# Supplementary material
Source: Royal Society of Chemistry journal article supplement (doi:10.1039/d5lf00395d)
Supplement: d5lf00395d1.pdf [file d5lf00395d1.pdf]

1 **Electronic supplementary information**

2

3 **From egg-shell to uniform distribution of platinum by atomic**  
4 **layer deposition on mesoporous alumina spheres: Experiments**  
5 **and modeling**

6

7 Christine Gonsalves,<sup>\*a</sup>, Jänis Järvillehto,<sup>a,b</sup> Saeed Saedy,<sup>b</sup> Jorge A. Velasco,<sup>a</sup> Thomas Grehl,<sup>c</sup>  
8 Philipp Brüner,<sup>c</sup> Niko Heikkinen,<sup>d</sup> Juha Lehtonen,<sup>d</sup> J. Ruud van Ommen,<sup>b</sup> and Riikka L. Puurunen<sup>\*a</sup>

9

10 **Contents**

|    |                                                                 |          |
|----|-----------------------------------------------------------------|----------|
| 11 | <b>S1 Experimental details</b>                                  | <b>2</b> |
| 12 | S1.1 Model description . . . . .                                | 2        |
| 13 | S1.2 Kn number and Thiele modulus calculation . . . . .         | 3        |
| 14 | S1.3 CO pulse chemisorption calculations . . . . .              | 4        |
| 15 | S1.4 Selection of the fluidization conditions . . . . .         | 5        |
| 16 | S1.5 Fluidized bed reactor schematic . . . . .                  | 6        |
| 17 | <b>S2 Results</b>                                               | <b>7</b> |
| 18 | S2.1 Support Characterization . . . . .                         | 7        |
| 19 | S2.2 Average areal number density calculation example . . . . . | 7        |
| 20 | S2.3 Metal weight loading: ICP-OES results . . . . .            | 9        |

---

<sup>a</sup> Department of Chemical and Metallurgical Engineering, Aalto University, P.O. Box 16100, FI-00076 AALTO, Finland.

<sup>b</sup> Department of Chemical Engineering, Process and Product Technology Institute, Delft University of Technology, Van der Maasweg 9, 2629 HZ Delft, The Netherlands.

<sup>c</sup> IONTOF GmbH, Münster, Germany

<sup>d</sup> VTT Technical Research Center Finland, P.O. Box 1000, FI-02044 VTT, Finland.

† Electronic supplementary information (ESI) available.

\* Corresponding authors. E-mail:christine.gonsalves@aalto.fi, riikka.puurunen@aalto.fi

|    |                                                                                     |    |
|----|-------------------------------------------------------------------------------------|----|
| 21 | S2.4 Pulse Chemisorption results: Characterization with mass spectroscopy . . . . . | 11 |
| 22 | S2.5 Low-energy ion scattering . . . . .                                            | 11 |
| 23 | S2.6 X-ray photoelectron spectroscopy . . . . .                                     | 12 |
| 24 | S2.7 Diffusion–reaction modeling . . . . .                                          | 14 |

## 25 S1 Experimental details

### 26 S1.1 Model description

27 In this work, we use a diffusion–reaction model<sup>1</sup> for ALD on porous spheres to compare the radial  
 28 evolution of surface coverage with experimental results. The effective diffusion coefficient  $D_{\text{eff}}$   
 29 ( $\text{m}^2\text{s}^{-1}$ ) valid for any diffusion regime is calculated as<sup>1,2</sup> (also equation 4 in the main manuscript):

$$D_{\text{eff}} = \frac{\varepsilon}{\tau} \cdot \left( \frac{1}{\frac{1}{D_A} + \frac{1}{D_{\text{Kn}}}} \right). \quad (1)$$

30 Here,  $\varepsilon$  is porosity (-),  $\tau$  is tortuosity (-),  $D_A$  ( $\text{m}^2\text{s}^{-1}$ ) is the molecular diffusion coefficient of the  
 31 reactant gas and  $D_{\text{Kn}}$  ( $\text{m}^2\text{s}^{-1}$ ) is the Knudsen diffusion coefficient.

32 The molecular diffusion coefficient  $D_A$  accounts for the thermal velocity and collision fre-  
 33 quency of the reactant (gas A) and inert gases (gas I). It is expressed by<sup>3,4</sup>:

$$D_A = \frac{3\pi\bar{v}_A^2}{16z_A}, \quad (2)$$

34 where  $\bar{v}_A$  is thermal velocity *i.e.*, the average speed ( $\text{m s}^{-1}$ )<sup>3,4</sup>, given by

$$\bar{v}_A = \sqrt{\frac{8RT}{\pi M_A}}. \quad (3)$$

35 The  $z_A$  is the collision frequency is calculated from<sup>3,4</sup>

$$z_A = \frac{\pi}{4}(d_A + d_I)^2 \sqrt{\frac{8RT}{\pi} \left( \frac{1}{M_A} + \frac{1}{M_I} \right) \frac{p_I N_0}{RT}} + \pi(d_A)^2 4 \sqrt{\frac{RT}{\pi M_A} \frac{p_A N_0}{RT}}. \quad (4)$$

36 Here,  $d_A$  and  $d_I$  (m) are the hard-sphere diameters of reactant and inert gas,  $M_A$  and  $M_I$  ( $\text{kg mol}^{-1}$ )  
 37 are the molecular weights of the reactant and inert gas,  $N_0$  is Avogadro’s constant ( $\text{mol}^{-1}$ ) and  $p_I$

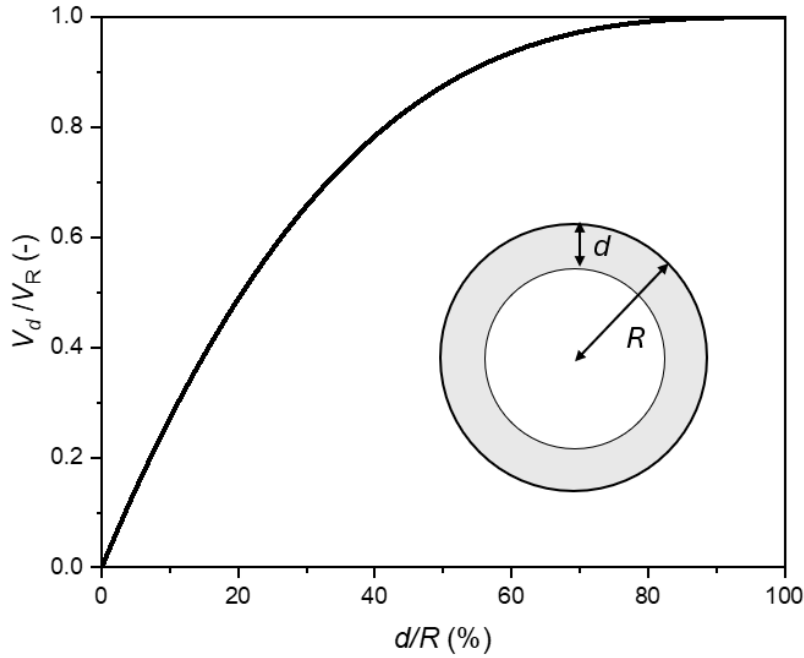

**Figure S1** Ratio of coated volume to total internal volume as a function of percentage penetration depth within a spherical porous particle. This figure was recreated from Refs.<sup>6</sup> and<sup>7</sup>.

38 (Pa) is the partial pressure of the inert gas. The Knudsen diffusion coefficient<sup>1,4,5</sup> is given by

$$D_{\text{Kn}} = d_{\text{pore}} \sqrt{\frac{8RT}{9\pi M_A}}. \quad (5)$$

39 Here,  $d_{\text{pore}}$  is the pore diameter (m),  $R$  ( $8.314 \text{ JK}^{-1} \text{ mol}^{-1}$ ) is the universal gas constant,  $T$  (K) is  
 40 the temperature of the ALD process, and  $M_A$  ( $\text{kg mol}^{-1}$ ) is the molar mass of the reactant gas.

#### 41 **S1.2 Kn number and Thiele modulus calculation**

42 The Knudsen number  $\text{Kn}$  (dimensionless) is a ratio of the mean free path  $\lambda$  (m) of a gas molecule  
 43 to a characteristic physical length scale, in this case the pore diameter  $d_{\text{pore}}$  (m) given by<sup>3-5</sup>

$$\text{Kn} = \frac{\lambda}{d_{\text{pore}}}. \quad (6)$$

44 For a system of two gases, the mean free path is calculated as<sup>3-5</sup>

$$\lambda = \frac{k_B T}{\sqrt{2} p_{A0} \sigma_{A,A} + \sqrt{1 + \frac{m_A}{m_I} p_I} \sigma_{A,I}}, \quad (7)$$

45 where  $k_B$  ( $J K^{-1}$ ) is the Boltzmann constant,  $T$  (K) is the temperature, and  $m_A$  and  $m_I$  (kg) are  
46 the masses of the molecules of reactant A and inert gas I, respectively. Also,  $p_{A0}$  (Pa) is the partial  
47 pressure of reactant A and  $p_I$  (Pa) is the inert gas partial pressure. The  $\sigma_{A,A}$  and  $\sigma_{A,I}$  are the collision  
48 cross sections ( $m^2$ ) between the molecules  $i$  and  $j$ , given by<sup>3-5</sup>

$$\sigma_{i,j} = \pi \left( \frac{d_i}{2} + \frac{d_j}{2} \right)^2, \quad (8)$$

49 where  $d_i$  (m) and  $d_j$  (m) are the hard-sphere diameters of the molecules  $i$  and  $j$ , respectively.

50 The Thiele modulus  $h_T$  (-) is calculated from<sup>5,8</sup>:

$$h_T = R \sqrt{\frac{c \bar{v}_A}{2 d_{\text{pore}} D_{\text{eff}}}}, \quad (9)$$

51 where  $R$  (m) is the sphere radius.

### 52 **S1.3 CO pulse chemisorption calculations**

53 From the cumulative amount of CO gas chemisorbed (results in Table 4 of the main manuscript),  
54 the metal dispersion ( $D$ ) and hemispherical crystallite size were calculated as described below.

55 Dispersion  $D$  is the fraction of metal atoms that are accessible on the surface ( $N_s$ ) relative to the  
56 total number of metal atoms in the sample ( $N_{\text{tot}}$ ):

$$D = \frac{N_s}{N_{\text{tot}}}.$$

57 The dispersion is calculated from the quantity of CO chemisorbed as follows:

$$D = \frac{V_{\text{ads,irr}} \times n \times M_M}{V_{\text{mol}} \times w_M},$$

58 where  $V_{\text{ads,irr}}$  is the volume of irreversibly chemisorbed CO at STP ( $\text{cm}^3 \text{g}^{-1}$ ),  $n$  is the stoichiometric

59 factor (number of CO molecules adsorbed per surface metal atom, here  $n = 1$ ),  $M_M$  is the atomic  
60 weight of the metal ( $\text{g mol}^{-1}$ ),  $V_{\text{mol}}$  is the molar volume of the adsorbate gas at STP ( $22.414 \text{ L/mol}$   
61 equal to  $22\,414 \text{ cm}^3 \text{ mol}^{-1}$ ), and  $w_M$  (wt%) is the metal weight loading of the sample.

62 The surface area of the active metal per gram of sample,  $A_M$  ( $\text{m}^2 \text{ g}_{\text{sample}}^{-1}$ ), can be calculated  
63 from the amount of irreversibly adsorbed CO using

$$A_M = \frac{V_{\text{ads,irr}} \times N_0 \times n \times a_M}{V_{\text{mol}}},$$

64 where  $a_M$  is the average surface area of a single metal atom (in this case Pt atomic cross sectional  
65 area is  $0.080 \text{ nm}^2$  and the density of Pt is  $21.45 \text{ g cm}^{-3}$ )<sup>9,10</sup>.

66 Once the metal surface area and total metal content are known, the average particle size can  
67 be estimated using geometrical assumptions, assuming hemispherical particles. For a sphere, the  
68 volume-to-surface area ratio is  $V_R/A_R = R/3$ , where  $V_R$  is the total internal volume of a sphere of  
69 radius  $R$ , and  $A_R$  is the surface area of the sphere. Knowing the metal loading  $w_M$  (wt%) and the  
70 bulk metal density  $\rho_M$  ( $\text{g cm}^{-3}$ ), the particle radius can be calculated as  $R_M = 3w_M/(\rho_M A_M)$ , where  
71  $A_M$  is the measured metal surface area. The corresponding average particle diameter is twice the  
72 radius,  $d_M = 2R_M = 6w_M/(\rho_M A_M)$ .

#### 73 **S1.4 Selection of the fluidization conditions**

74 Tests were done to estimate the fluidization velocity for the alumina spheres. For the tests, a mixture  
75 of 25 g of glass beads (diameter: 125-150  $\mu\text{m}$ ) and several porous alumina spheres (diameter:  
76 2.5 mm, SASOL Limited) was fluidized at room temperature at superficial gas velocities ranging  
77 from 1.7 cm/s (0.5 l/min) to 3.4 cm/s (1 l/min), [normal liter per second, at 1 atm and 20 °C] to  
78 determine the minimum fluidization velocity,  $U_{mf}$ . The alumina spheres (originally white in color)  
79 were treated with ink to ease the assessment of particle circulation in the bed. The fluidization  
80 tests indicated a minimum fluidization velocity,  $U_{mf}$  of approximately 2.7 cm/s, achieved with a  
81 flow rate of 0.80 l/min through the column. Thus, a flow rate of 1.0 l/min was selected for the  
82 experiments, resulting in a fluidization velocity of approximately 3.4 cm/s.

## 83 S1.5 Fluidized bed reactor schematic

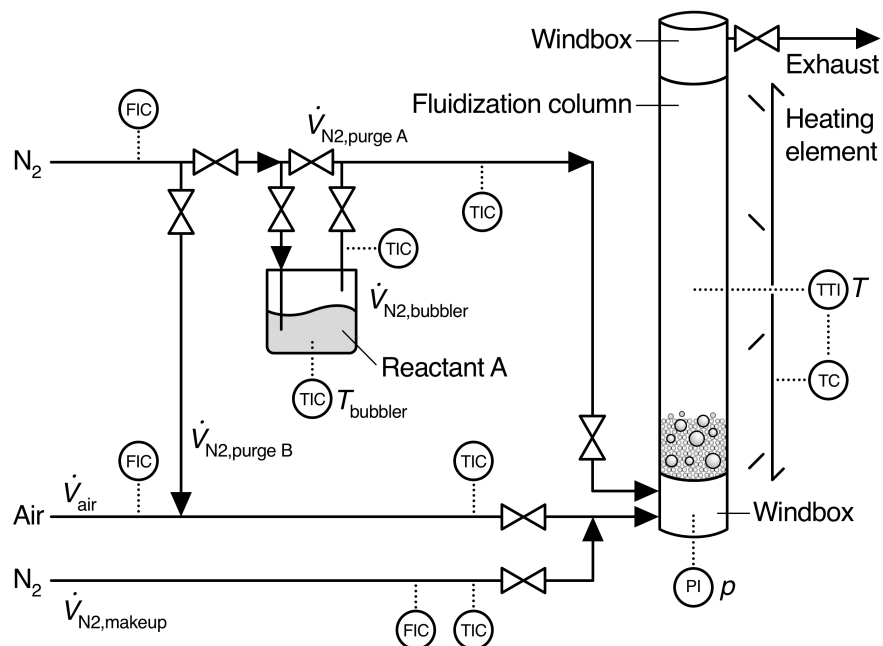

**Figure S2** Simplified schematic of the ALD equipment<sup>11</sup>. The instrumentation used to monitor and control the process includes control valves, flow indicators and controllers (FIC), temperature indicators and controllers (TIC), a temperature transmitter and indicator (TTI), a temperature controller (TC) and a pressure indicator (PI). In the fluidization column, glass beads are denoted by small, faint circles, while the large, shaded circles represent porous alumina spheres. This reactor was similar to that used in the Grillo et al. work<sup>12</sup>.

## 84 S2 Results

### 85 S2.1 Support Characterization

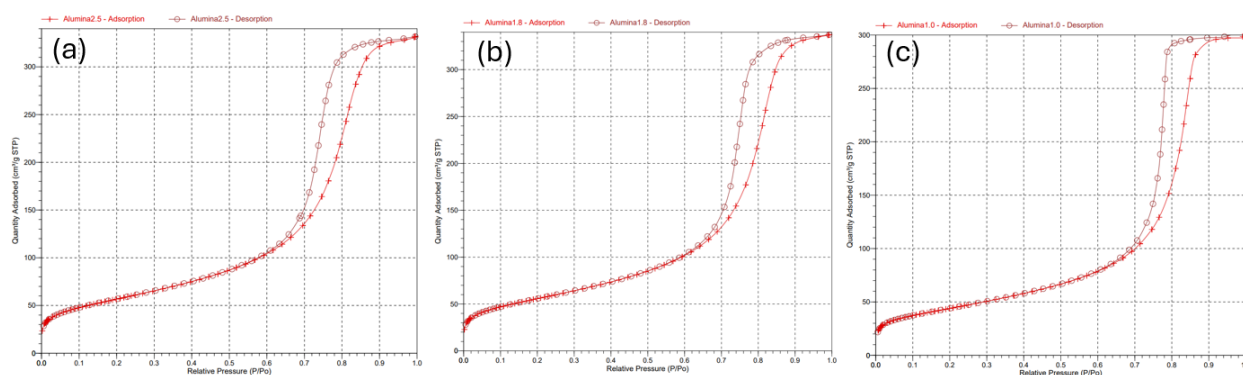

**Figure S3** Nitrogen adsorption-desorption isotherm of the alumina spheres of varying diameters: (a) 2.5 mm, (b) 1.8 mm, and (c) 1.0 mm. The plot exhibits a Type IV(a) isotherm with a hysteresis loop, characteristic of mesoporous materials.

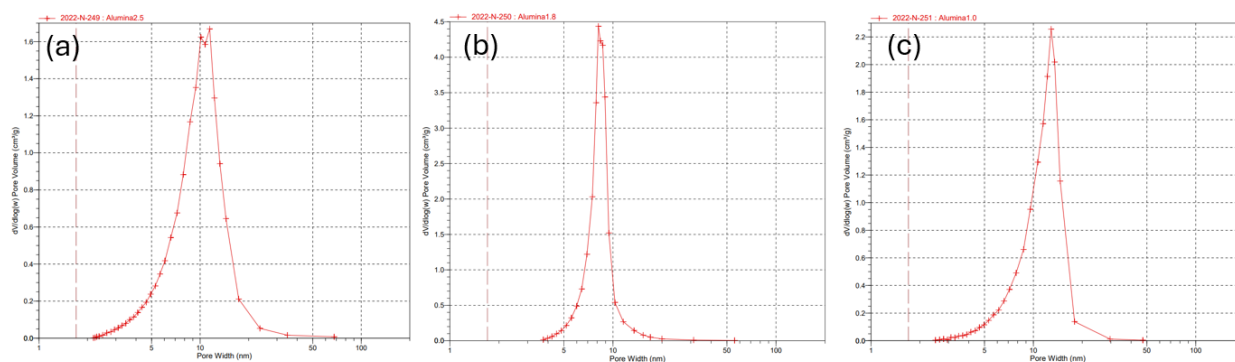

**Figure S4** Barrett-Joyner-Halenda (BJH) pore size distributions for alumina spheres of varying diameters: (a) 2.5 mm, (b) 1.8 mm, and (c) 1.0 mm. All samples show a narrow pore size distribution in the mesoporous range.

### 86 S2.2 Average areal number density calculation example

87 The average areal number density  $c_M(\text{nm}^{-2})$  can be calculated<sup>13 14</sup> using Equation 1 of the main  
88 manuscript, also written here:

$$c_M = \frac{w_M N_0 m_t}{M_M S m_s}. \quad (10)$$

89 Here,  $w_M$  is the weight fraction of the metal,  $N_0$  ( $\text{mol}^{-1}$ ) is Avogadro's constant,  $M_M$  ( $\text{g}_{\text{metal}} \text{mol}^{-1}$ )  
 90 is the molar mass of the metal,  $S$  ( $\text{m}^2 \text{g}_{\text{support}}^{-1}$ ) is the specific surface area of the support,  $m_t$  ( $\text{g}_{\text{sample}}$ )  
 91 is the total mass of the sample including the amount of the deposited material, and  $m_s$  ( $\text{g}_{\text{support}}$ ) is  
 92 the mass of the original support.

93 Now since  $m_t = m_s + m_{\text{Pt}}$ , and  $w_M = m_{\text{Pt}}/m_t$ ;  $m_{\text{Pt}}$  being the mass of the deposited Pt,

$$\frac{m_t}{m_s} = \frac{m_t}{m_t - m_{\text{Pt}}} = \frac{m_t}{m_t - (w_M \cdot m_t)} = \frac{1}{1 - w_M}$$

94 Equation 10 thus becomes:

$$c_M = \frac{w_M N_A}{M_M S} \frac{1}{1 - w_M}. \quad (11)$$

95 In this work, the Pt loading in terms of wt% after five cycles, with an exposure time of 1440  
 96 s for the 2.5 mm sphere, was 4.00 wt%. The specific surface area  $S$  of the alumina support was  
 97  $206 \text{ m}^2 \text{ g}^{-1}$ , Avogadro's constant is  $6.022 \times 10^{23} \text{ mol}^{-1}$ , and the molar mass of Pt is  $195 \text{ g mol}^{-1}$ .  
 98 Plugging these values into the above equation:

$$c_M = \frac{\left(\frac{5.61}{100}\right) \times 6.022 \times 10^{23} \text{ mol}^{-1}}{195 \text{ g mol}^{-1} \times 206 \text{ m}^2 \text{ g}^{-1}} \frac{1}{1 - \left(\frac{5.61}{100}\right)}$$

99

$$c_M = 0.62 \text{ Pt atoms/nm}^2$$

100 The average areal number density  $c_M$  after five ALD cycles is  $0.62 \text{ Pt atoms/nm}^2$ , so after one  
 101 cycle, the average areal number density is  $0.12 \text{ nm}^{-2}$ . This calculation assumes that the mass of Pt  
 102 added to the sample after ALD does not affect the total surface area of the sample.

### 103 S2.3 Metal weight loading: ICP-OES results

**Table S1** Numerical values for average Pt loading (wt%) for the different sphere diameters from ICP-OES results of Figure 1a of the main manuscript. Calculated values for the average areal number density (Figure 1b of the main manuscript) are also shown.

| Exposure time (s) | Pt loading (wt%) |        |        | Average areal number density, Five cycles (Pt atoms/nm <sup>2</sup> ) |        |        | Average areal number density, One cycle, (Pt atoms/nm <sup>2</sup> ) |        |        |
|-------------------|------------------|--------|--------|-----------------------------------------------------------------------|--------|--------|----------------------------------------------------------------------|--------|--------|
|                   | 1.0 mm           | 1.8 mm | 2.5 mm | 1.0 mm                                                                | 1.8 mm | 2.5 mm | 1.0 mm                                                               | 1.8 mm | 2.5 mm |
| 180               | 1.38             | 1.26   | 0.94   | 0.27                                                                  | 0.20   | 0.14   | 0.05                                                                 | 0.04   | 0.03   |
| 360               | 1.76             | 2.06   | 1.64   | 0.35                                                                  | 0.32   | 0.25   | 0.07                                                                 | 0.06   | 0.05   |
| 720               | 2.47             | 3.07   | 2.85   | 0.49                                                                  | 0.48   | 0.44   | 0.10                                                                 | 0.10   | 0.09   |
| 1440              | 3.51             | 4.05   | 4.00   | 0.71                                                                  | 0.65   | 0.62   | 0.14                                                                 | 0.13   | 0.12   |

104 For the largest sphere size with a diameter of 2.5 mm (radius  $R = 1.25$  mm), for which the coating  
 105 penetration profile was measured (Figure 3 of the main article) it was possible to estimate the  
 106 penetration depth  $d$ , and the areal number density of Pt in the specific coated area of the sphere  
 107  $A_{\text{coat}}$ , the results are shown in Table S2. This areal number density is not an average value but is  
 108 based on the coated volume fraction  $\phi_{\text{coat}}$  discussed in Equation 8 of the main article, also written  
 109 here below as:

$$\phi_{\text{coat}} = \frac{V_d}{V_R} = \frac{(R^3 - (R - d)^3)}{R^3}. \quad (12)$$

110 The reported values of the areal number density (Table S2) are estimates based on the visual  
 111 determination of the penetration depth  $d$  at half coverage, from the LEIS results (Figure 3 of the  
 112 main article), and the coated volume fraction  $\phi_{\text{coat}}$  (Equation 12). The calculation assumes a step-  
 113 like saturation profile, which is a simplification compared to the more gradual saturation fronts  
 114 observed experimentally.

115 The specific coated area of the sphere  $A_{\text{coat}}$  was determined from:

$$A_{\text{coat}} = S \times \phi_{\text{coat}}. \quad (13)$$

116 The areal number density based on the coated volume fraction was calculated using the relation:

$$c_M = \frac{w_M N_0}{M_M A_{\text{coat}}} \frac{m_t}{m_s}, \quad (14)$$

117 and is reported in Table S2. The areal number density calculated in this way ( i.e., based on the  
118 coated volume fraction) increases slowly with increasing exposure time.

**Table S2** Areal number density for the sphere of diameter 2.5 mm (Specific surface area  $S = 206 \text{ m}^2/\text{g}$ ) based on the coated volume fraction of the sphere.

| Exposure time $t$ (s) | Pt loading (wt%) | Penetration depth $d^a$ ( $\mu\text{m}$ ) | Coated volume fraction $\phi_{coat}$ (-) | Areal number density based on $\phi_{coat}$ (Pt atoms/ $\text{nm}^2$ ) | Areal number density based on $\phi_{coat}$ , One cycle (Pt atoms/ $\text{nm}^2$ ) |
|-----------------------|------------------|-------------------------------------------|------------------------------------------|------------------------------------------------------------------------|------------------------------------------------------------------------------------|
| 180                   | 0.94             | 300                                       | 0.561                                    | 0.25                                                                   | 0.05                                                                               |
| 360                   | 1.64             | 500                                       | 0.784                                    | 0.32                                                                   | 0.06                                                                               |
| 720                   | 2.85             | 1150                                      | 0.999                                    | 0.44                                                                   | 0.09                                                                               |
| 1440                  | 4.00             | 1250                                      | 1.000                                    | 0.62                                                                   | 0.12                                                                               |

<sup>a</sup> Penetration depth was estimated from the LEIS results (Figure 3 of the main article), as the distance where the Pt intensity reduced to half of its initial value.

## 119 S2.4 Pulse Chemisorption results: Characterization with mass spectroscopy

**Table S3** Characterization results from CO pulse chemisorption (mass spectrometry measurements,  $m/z=28$  (CO) ) done on Pt-coated alumina spheres of diameter 2.5 mm.

| MeCpPtMe <sub>3</sub> exposure time (s) | Cumulative CO quantity (cm <sup>3</sup> ) (STP) | Cumulative CO quantity (μ mol/g) | Cumulative quantity (CO (molecules) /nm <sup>2</sup> ) | ICP-OES weight loading (%) for 2.5 mm sphere) | Areal number density (Pt atoms /nm <sup>2</sup> ) | Crystallite size (hemisphere) (nm) | Metal dispersion |
|-----------------------------------------|-------------------------------------------------|----------------------------------|--------------------------------------------------------|-----------------------------------------------|---------------------------------------------------|------------------------------------|------------------|
| 180                                     | 1.31                                            | 58.26                            | 0.17                                                   | 0.94                                          | 0.14                                              | <sup>a</sup>                       | <sup>a</sup>     |
| 360                                     | <sup>b</sup>                                    | <sup>b</sup>                     | <sup>b</sup>                                           | 1.64                                          | 0.25                                              | <sup>b</sup>                       | <sup>b</sup>     |
| 720                                     | 2.69                                            | 119.85                           | 0.35                                                   | 2.85                                          | 0.44                                              | 1.38                               | 82.04%           |
| 1440                                    | 2.55                                            | 113.95                           | 0.33                                                   | 4.00                                          | 0.62                                              | 2.04                               | 55.58 %          |

<sup>a</sup> The cumulative quantity of CO chemisorbed in terms of the CO molecules/nm<sup>2</sup> of the surface exceeded the corresponding number of Pt atoms/nm<sup>2</sup>. The stoichiometry in this case may differ from the stoichiometry value of one used in the dispersion and crystallite size calculations.

<sup>b</sup> During the CO pulse chemisorption measurements, there was an instrumental failure in the mass spectrometer during the experiment and hence data was not collected.

## 120 S2.5 Low-energy ion scattering

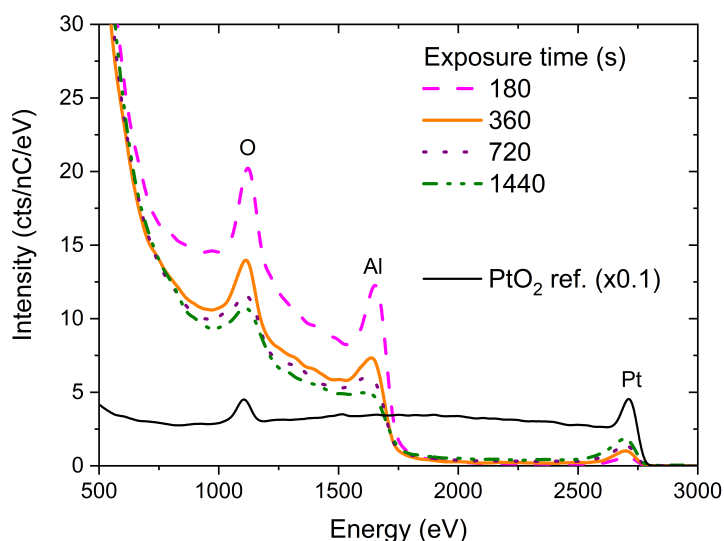

**Figure S5** Representative example LEIS spectra (averaged over the entire cross-sectional area of the sphere) corresponding to Figures 2 and 3 of the main article. A PtO<sub>2</sub> powder reference (Sigma-Aldrich, CAS 1314-15-4) is included and plotted scaled  $\times 0.1$ . O, Al, and Pt peaks are labeled.

## 121 **S2.6 X-ray photoelectron spectroscopy**

122 The atomic fraction of platinum within the porous alumina spheres were determined by Thermo  
123 Scientific K Alpha X-ray photoelectron spectroscope (XPS). Before analysis, the spheres were  
124 mechanically cut approximately in half with scissors to obtain cross-sections. In each scan, an  
125 elliptical area of  $\sim 380 \mu\text{m} \times 770 \mu\text{m}$  was scanned with a monochromated X-ray, emitted from  
126 aluminum  $K\alpha$  radiation. A photon energy of 1486.7 eV was used with a step size of 0.157 eV.  
127 A flood gun was employed to compensate for the differential charging. The peak locations were  
128 calibrated using the aliphatic carbon 1s peak (located at 284.8 eV). The CasaXPS software was  
129 used to interpret the acquired spectra.

130 Figure S6 presents XPS line scans showing Pt distribution from the outer surface to the center  
131 and back, of porous spheres of size 2.5 mm after ALD with different exposure times. With an  
132 increase in exposure time, the overall value of the Pt signal, including its initial value, increased.  
133 For exposure times of 180, 360, and 720 s, the atomic fraction of Pt decreased along the porous  
134 sphere, reached a plateau at its center, and then increased again toward the outer surface of the  
135 porous sphere. For the sample with the longest exposure time of 1440 s, a minor decrease in the  
136 metal fraction was observed at the center (change was about 5% of the original value from 1.52 %  
137 to 1.44%), whereas the overall distribution of Pt was seen to be uniform across the porous sphere.  
138 The increasing XPS signal intensity at the outer edges of the particle with time is consistent with the  
139 increasing platinum areal number density calculated for the coated volume fraction by combining  
140 the LEIS results and weight loading data from ICP-OES (Table S2).

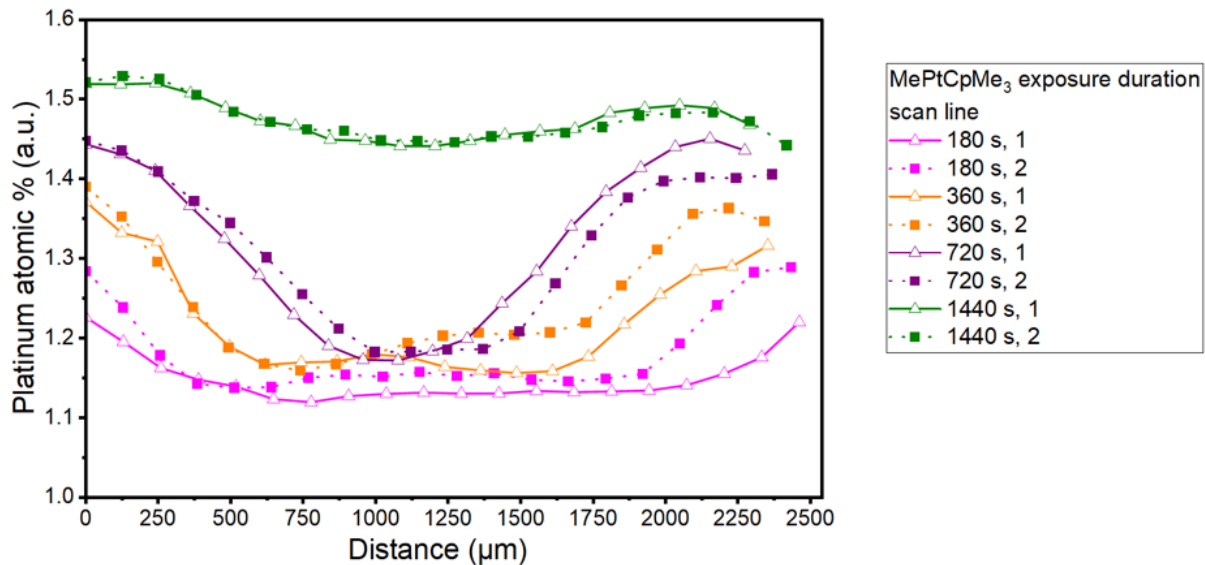

**Figure S6** Atomic percentage of platinum along the radial direction from XPS analysis on a cross-section of 2.5 mm diameter alumina spheres for different exposure times. Two scans per particle along the radius were done (see Figure S7 for scan directions).

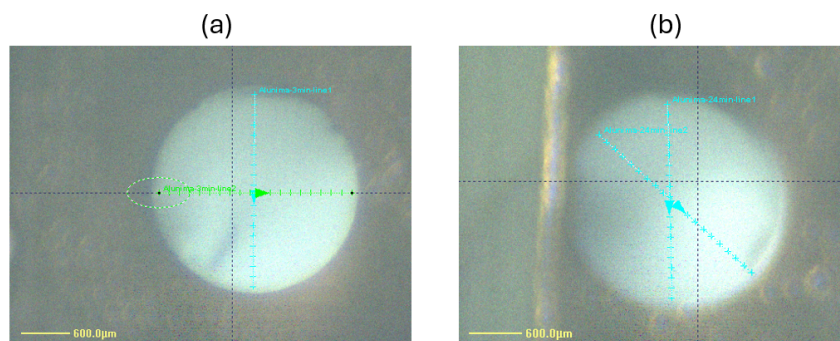

**Figure S7** Siting of XPS scans from images taken from the optical camera of the XPS instrument on the cross-sections of the cleaved 2.5 mm alumina spheres. Samples with exposure times of 180, 360, and 720 s were scanned as shown in Panel (a), and the sample with exposure time of 1440 s was scanned as in Panel (b). The direction of the scans were selected to avoid rough surfaces with large voids or terraces as a result of sample cleavage.

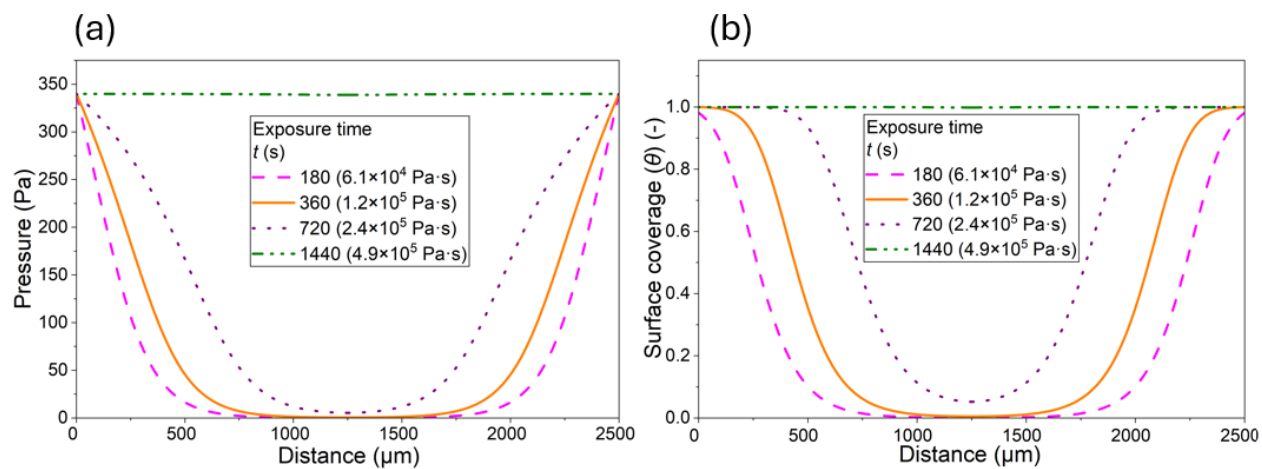

**Figure S8** MePtCpMe<sub>3</sub> pressure profiles corresponding to the saturation profiles shown in panel (b). Panel (b) saturation profiles are the same as in Figure 4a of the main article.

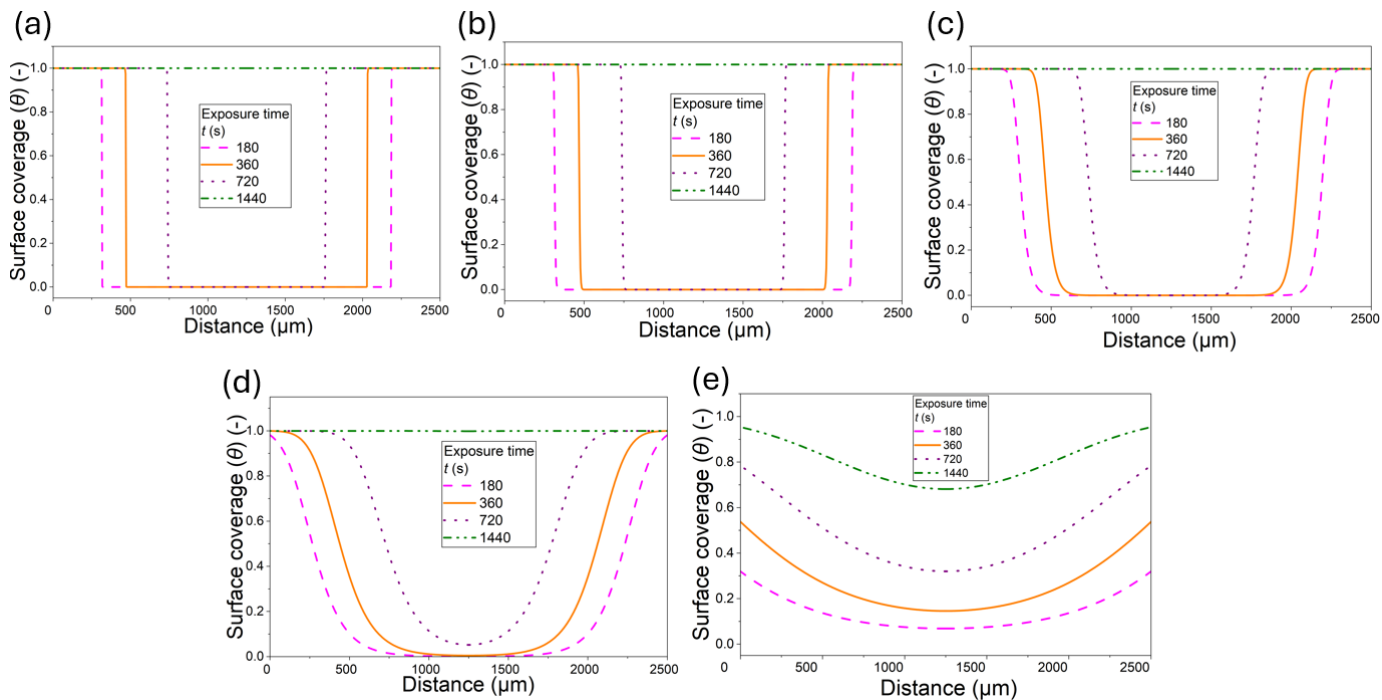

**Figure S9** Simulated surface coverage profiles, along the radial direction from the outer surface towards the center and back, along the radius of a 2.5 mm alumina sphere for different sticking coefficients: (a)  $c = 10^{-3}$ , (b)  $c = 10^{-6}$ , (c)  $c = 10^{-8}$ , (d)  $c = 10^{-9}$ , and (e)  $c = 10^{-10}$ . Other simulation parameters are as specified in the caption of Figure 4 of the main article.

## 142 **References**

- 143 [1] N. Heikkinen, J. Lehtonen and R. L. Puurunen, An atomic layer deposition diffusion–reaction  
144 model for porous media with different particle geometries, *Physical Chemistry Chemical*  
145 *Physics*, 2024, **26**, 7580–7591.
- 146 [2] R. Evans III, G. Watson and E. Mason, Gaseous diffusion in porous media at uniform pressure,  
147 *The journal of chemical physics*, 1961, **35**, 2076–2083.
- 148 [3] M. Ylilammi, O. M. E. Ylivaara and R. L. Puurunen, Modeling growth kinetics of thin films  
149 made by atomic layer deposition in lateral high-aspect-ratio structures, *Journal of Applied*  
150 *Physics*, 2018, **123**, 205301.
- 151 [4] J. Yim, E. Verkama, J. A. Velasco, K. Arts and R. L. Puurunen, Conformality of atomic layer  
152 deposition in microchannels: impact of process parameters on the simulated thickness profile,  
153 *Physical Chemistry Chemical Physics*, 2022, **24**, 8645–8660.
- 154 [5] C. Gonsalves, J. A. Velasco, J. Yim, J. Järvillehto, V. Vuorinen and R. L. Puurunen, Simulated  
155 conformality of atomic layer deposition in lateral channels: the impact of the Knudsen num-  
156 ber on the saturation profile characteristics, *Physical Chemistry Chemical Physics*, 2024, **26**,  
157 28431–28448.
- 158 [6] J. Dendooven, *Atomically-Precise Methods for Synthesis of Solid Catalysts*, Royal Society of  
159 Chemistry, Cambridge, UK, 2014, vol. 22.
- 160 [7] C. Detavernier, J. Dendooven, S. P. Sree, K. F. Ludwig and J. A. Martens, Tailoring  
161 nanoporous materials by atomic layer deposition, *Chemical Society Reviews*, 2011, **40**, 5242–  
162 5253.
- 163 [8] E. W. Thiele, Relation between catalytic activity and size of particle, *Industrial & Engineering*  
164 *Chemistry*, 1939, **31**, 916–920.
- 165 [9] G. Bergeret and P. Gallezot, in *Handbook of Heterogeneous Catalysis*, Wiley-VCH, Wein-  
166 heim, 2nd edn., 2008, vol. 2, ch. 3.1.2, pp. 738–765.
- 167 [10] Micromeritics Instrument Corporation, *AutoChem III Software*, 2025, Version 1.03 (593cf7a).

- 168 [11] J. Järvillehto, *Master's thesis*, Aalto University, 2023.
- 169 [12] F. Grillo, H. Van Bui, D. La Zara, A. A. Aarnink, A. Y. Kovalgin, P. Kooyman, M. T. Kreutzer  
170 and J. R. van Ommen, From single atoms to nanoparticles: Autocatalysis and metal aggrega-  
171 tion in atomic layer deposition of Pt on TiO<sub>2</sub> nanopowder, *Small*, 2018, **14**, 1800765.
- 172 [13] R. L. Puurunen, Surface chemistry of atomic layer deposition: A case study for the trimethy-  
173 laluminum/water process, *Journal of Applied Physics*, 2005, **97**, 121301.
- 174 [14] J. Yim, E. Haimi, M. Mäntymäki, V. Kärkäs, R. Bes, A. A. Gutierrez, K. Meinander, P. Brüner,  
175 T. Grehl, L. Gell, T. Viinikainen, K. Honkala, S. Huotari, R. Karinen, M. Putkonen and R. L.  
176 Puurunen, Atomic Layer Deposition of Zinc Oxide on Mesoporous Zirconia Using Zinc(II)  
177 Acetylacetonate and Air, *Chemistry of Materials*, 2023, **35**, 7915–7930.
